# Supplementary material for: Distinct modulation of microsaccades in motor planning and covert attention
Source: Springer Nature journal article supplement (doi:10.1038/s41598-025-03000-z), 2025-06-04
Supplement: MOESM1 [file 41598_2025_3000_MOESM1_ESM.docx]

**Distinct Modulation of Microsaccades in Motor Planning and Covert Attention**

**Brandolani Riccardo1,2, Galletti Claudio1, Fattori Patrizia1, Breveglieri Rossella1*#, Poletti Martina3*.**

1 Department of Biomedical and Neuromotor Sciences, University of Bologna, Piazza di Porta San Donato, 2, 40126 Bologna (Italy)

2 University of Camerino, Center for Neuroscience, 62032 Camerino (Italy)

3 Department of Brain & Cognitive Sciences, University of Rochester, New York 14642, USA

*Equal contribution

#Corresponding author: Prof. Rossella Breveglieri; E-mail: [rossella.breveglieri@unibo.it](mailto:rossella.breveglieri@unibo.it)

**Keywords**: microsaccades, covert attention, visual perception, motor planning.

Supplemental results

*Microsaccades have no effects on reaction times during motor planning*

In the motor preparation experiment, reaction time (RT) was influenced by the direction of microsaccades during the direction cue epoch of reach trials (one-way repeated measures ANOVA [F(1,12) = 4.691, partial eta squared = 0.439, p = 0.031]; Friedman’s test p = 0.054; Fig. S1A). However, post hoc tests revealed only a significant difference of RTs in incongruent trials (345.85 ± 76.05 ms) compared to other trials (372.85 ± 101.79 ms) (p = 0.03, Newman-Keuls post hoc test, Fig. S1A), whereas all the other comparisons were not significant (all p > 0.05, Newman-Keuls post hoc test, Fig. S1A). No other significant effects were observed in any other epoch for either saccade or reach trials (one-way repeated measures ANOVAs [all F < 0.782, all partial eta squared < 0.115, all p > 0.48]; all Friedman’s test p > 0.368; Fig. S1B-D).


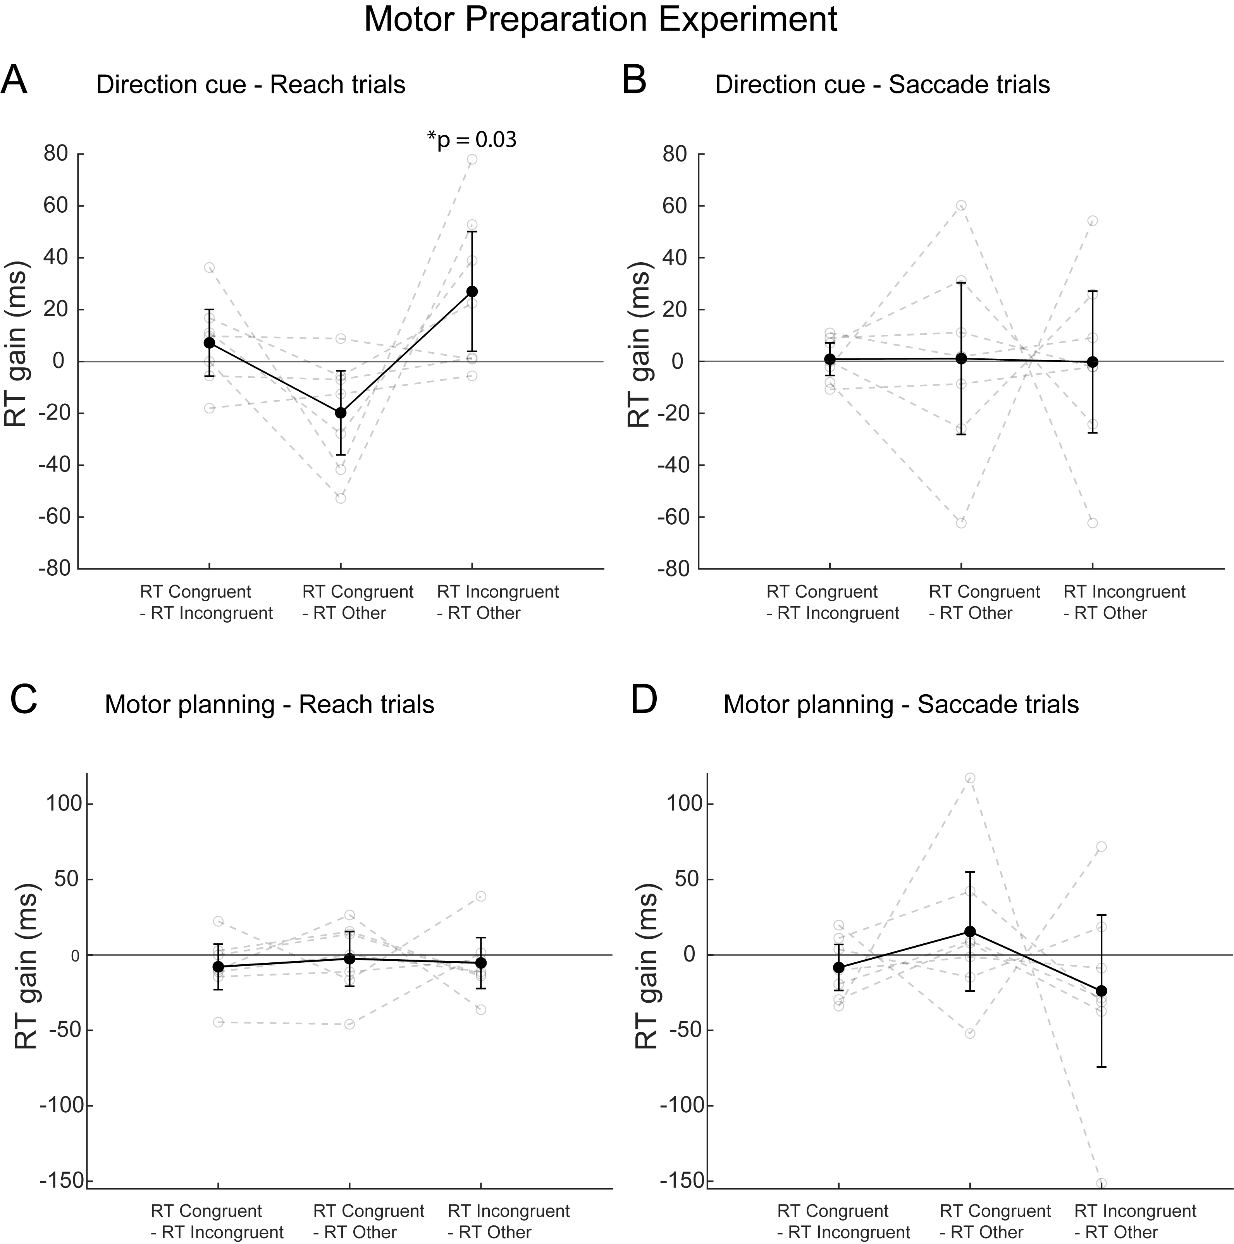


**Figure S1: Reaction time and microsaccade directionality.** A-B) Motor Preparation experiment; effect of microsaccade directionality on the RT gain (expressed as a difference in RT between trials with microsaccade congruent vs. incongruent, congruent vs other and incongruent vs other) in the direction cue epoch of reach trials (A) and saccade trials (B). C-D) Motor Preparation experiment; effect of microsaccade directionality during motor planning epoch on reaction times in reach trials (C) and saccade trials (D). Gray lines represent single subjects, error bars represent 95% confidence intervals. Same conventions as in Fig. 4.

*A more conservative categorization of horizontal microsaccades shows a weaker directional bias in the motor preparation experiment.*

We initially used a 120° deg angle tolerance to classify microsaccades toward and away from the cue. This is more conservative compared to the commonly used left-right from midline classification (see 1–4), which also include microsaccades close to vertical midline. When binning more finely (90° and 60° angle tolerance) we are still left with a large enough number of toward and away microsaccades per subject (first experiment: ~283 toward ~199 away at 90°, ~244 toward ~167 away at 60°; second experiment: ~183 toward ~160 away at 90°, ~149 toward ~129 away at 60°) to allow for a meaningful statistical comparison. Here we analyze the microsaccade direction bias using a more conservative categorization of toward and away microsaccades.

As expected, narrowing the tolerance angle for defining “toward” and “away” microsaccades increased the likelihood of "other" (vertical) microsaccades. However, the probability of “other” microsaccades appeared to be lower in the perceptual detection experiment than in the motor preparation one, with significant differences still being present at 90° (Fig. S2A, one-way statistical parametric mapping analysis of variance: Toward vs Other [F = 12, p = 0.001], Away vs Other [F = 11.77, p = 0.001]). This difference was lost in the perceptual detection experiment at 60° and was never present in the motor preparation experiment at both 90° and 60° (Fig. S2B-D, [all F < 11.89, all p > 0.05]). Furthermore, the distinction between toward and away microsaccades persisted at narrow angles in the perceptual detection task (Fig. S2A-B, Toward vs Away [all F > 11.9, all p < 0.03]) but disappeared in the motor preparation task at both 90° and 60° angles (Toward vs Away, Fig. S2C-D, [all F < 11.6, all p > 0.05]).


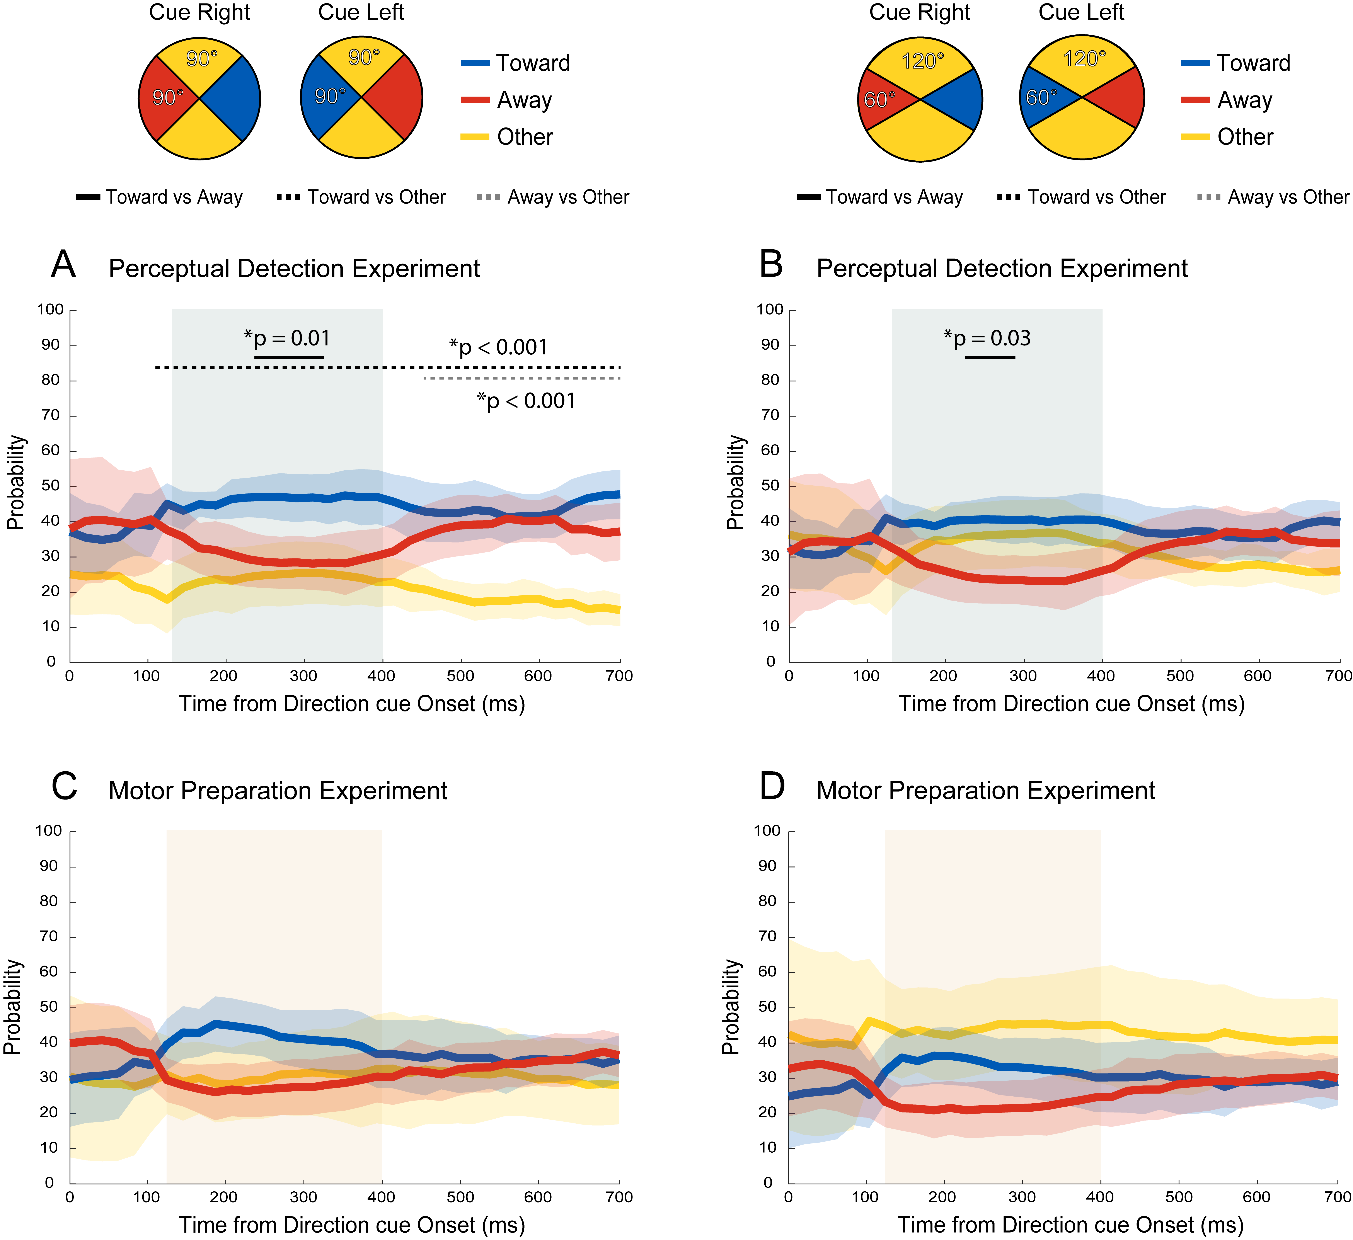


**Figure** **S2. Microsaccade direction over time in the direction cue epoch using smaller horizontal angles.** Microsaccade direction was binned into three categories. The probability of microsaccade direction falling in each category is depicted in the graphs together with the corresponding microsaccade rate over time as a reference. Error bars represent 95% confidence intervals. Asterisks mark a statistically significant difference (one-way statistical parametric mapping analysis of variance). A) Perceptual detection experiment, direction cue epoch, results when using 90° bin width to classify toward and away microsaccades. B) Same as A but with 60° bin width C) Motor preparation experiment, direction cue epoch, results when using 90° bin width to classify toward and away microsaccades. D) Same as A but with 60° horizontal angles. Same conventions as in Fig. 3.

*Microsaccades have no effect on reaction times during motor planning*

To further investigate the specificity of the microsaccade direction effect on reaction times described in the main text, we conducted an additional analysis using the first microsaccade in the direction cue epoch, without restricting it to the time window where the probability of microsaccades being directed toward the cued direction was the highest (from 240 to 340 ms after the direction cue onset for the perceptual detection experiment, and from 160 to 260 ms for the motor preparation experiment).

The choice of a specific temporal window for the analysis of microsaccade congruency effects was based on some considerations. According to previous work 2,3,5,6, the directional bias of microsaccades is linked to the shifts of covert spatial attention occurring around 200 ms after the cue onset 7,8. In fact, in line with our findings, previous studies have shown a microsaccade directional bias emerging around 200-300 ms after the attentional cue onset 5. Therefore, we anticipated that the beneficial effects of microsaccade congruency on manual reaction times would emerge only for microsaccades occurring within this temporal window and not before. This expectation is also based on the consideration that earlier microsaccades may have been planned even before the direction cue presentation. It is, nevertheless, important to show that the effect of microsaccade congruency is limited to the window in which attention is deployed, and no effect is present for microsaccades occurring earlier.

For both experiments, we examined the effect of microsaccade congruency by selecting only the first microsaccade performed after the onset of the direction cue. As expected, in both the perceptual detection experiment (PDE) and the motor preparation experiment (MPE) cue-congruent microsaccades were not associated with faster manual reaction times (PDE, one-way repeated measure ANOVA [F(2,12) = 1.98, partial eta squared = 0.25, p = 0.18]; Friedman’s test, p = 0.17. MPE reach, ANOVA [F(2,12) = 3.06, partial eta squared = 0.34, p = 0.08]; Friedman’s test, p = 0.1. MPE saccade, ANOVA [F(2,12) = 0.04, partial eta squared = 0.006, p = 0.97]; Friedman’s test, p = 0.72). Consistent with our expectation that the congruency effect is linked to covert attention deployment, the analysis indicates that the effect was absent when considering the first microsaccade occurring after the direction cue onset.

**References**

1. Liu, B., Nobre, A. C. & van Ede, F. Functional but not obligatory link between microsaccades and neural modulation by covert spatial attention. *Nat Commun* **13**, 3503 (2022).

2. Engbert, R. & Kliegl, R. Microsaccades uncover the orientation of covert attention. *Vision Res* **43**, 1035–1045 (2003).

3. Hafed, Z. M. & Clark, J. J. Microsaccades as an overt measure of covert attention shifts. *Vision Res* **42**, 2533–2545 (2002).

4. Betta, E., Galfano, G. & Turatto, M. Microsaccadic response during inhibition of return in a target–target paradigm. *Vision Res* **47**, 428–436 (2007).

5. Laubrock, J., Engbert, R., Rolfs, M. & Kliegl, R. Microsaccades Are an Index of Covert Attention. *Psychol Sci* **18**, 364–366 (2007).

6. Laubrock, J., Engbert, R. & Kliegl, R. Microsaccade dynamics during covert attention. *Vision Res* **45**, 721–730 (2005).

7. Carrasco, M. Visual attention: The past 25 years. *Vision Res* **51**, 1484–1525 (2011).

8. Anton-Erxleben, K. & Carrasco, M. Attentional enhancement of spatial resolution: linking behavioural and neurophysiological evidence. *Nat Rev Neurosci* **14**, 188–200 (2013).
